# Supplementary material for: Regulation of Delta-Aminolevulinic Acid Dehydratase by Krüppel-Like Factor 1
Source: PubMed Central journal article supplement (PMC3463598; doi:10.1371/journal.pone.0046482), 2012-10-03

**A**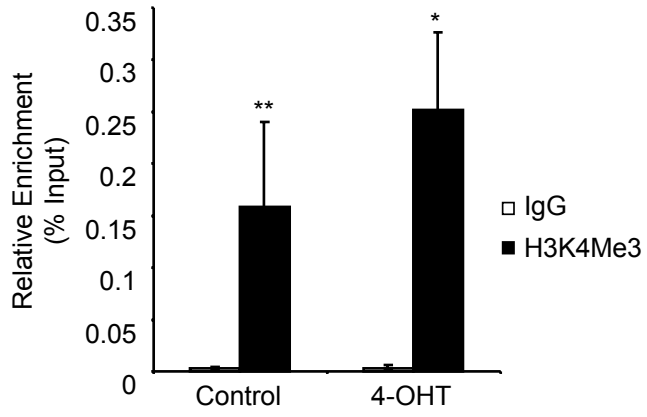**B**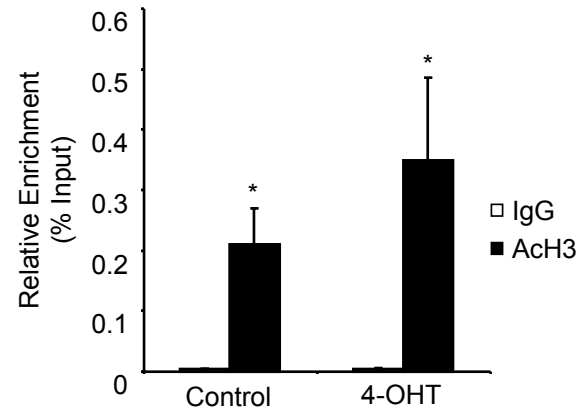

Supplement: pone.0046482.s004.pdf [file pone.0046482.s004.pdf]
